# Supplementary material
Source: PubMed Central journal article supplement (PMC6029532)
Supplement: 2018_197889-Disclosures_and_Contributios.pdf [file 2018_197889-Disclosures_and_Contributios.pdf]

Haematologica  
HAEMATOL/2018/197889  
Version 2

Immune failure, infection and survival in chronic lymphocytic leukemia  
in Denmark

Michael Asger Andersen and Carsten Utoft Niemann

Disclosures: CN has received consultancy fees and/or travel grants from Janssen, Abbvie, Novartis, Roche and Gilead, research support from Abbvie, outside this project.

Contributions: MAA and CUN performed the research, the performed data analysis and wrote the manuscript.
